# Supplementary material for: CRISPR–Cas12-based detection of SARS-CoV-2
Source: Springer Nature journal article supplement (doi:10.1038/s41587-020-0513-4), 2020-04-16
Supplement: 41587_2020_513_MOESM1_ESM.pdf [file 41587_2020_513_MOESM1_ESM.pdf]

In the format provided by the authors and unedited.

# CRISPR–Cas12-based detection of SARS-CoV-2

James P. Broughton <sup>1,7</sup>, Xianding Deng<sup>2,3,7</sup>, Guixia Yu<sup>2,3</sup>, Clare L. Fasching<sup>1</sup>, Venice Servellita<sup>2,3</sup>, Jasmeet Singh<sup>1</sup>, Xin Miao<sup>1</sup>, Jessica A. Streithorst<sup>2</sup>, Andrea Granados<sup>2,3</sup>, Alicia Sotomayor-Gonzalez<sup>2,3</sup>, Kelsey Zorn<sup>4</sup>, Allan Gopez<sup>2</sup>, Elaine Hsu<sup>2</sup>, Wei Gu<sup>2</sup>, Steve Miller<sup>2</sup>, Chao-Yang Pan<sup>5</sup>, Hugo Guevara<sup>5</sup>, Debra A. Wadford<sup>5</sup>, Janice S. Chen <sup>1</sup>✉ and Charles Y. Chiu <sup>2,3,6</sup> ✉

---

<sup>1</sup>Mammoth Biosciences, Inc., South San Francisco, CA, USA. <sup>2</sup>Department of Laboratory Medicine, University of California San Francisco, San Francisco, CA, USA. <sup>3</sup>UCSF-Abbott Viral Diagnostics and Discovery Center, San Francisco, CA, USA. <sup>4</sup>Department of Biochemistry and Biophysics, University of California San Francisco, San Francisco, CA, USA. <sup>5</sup>Viral and Rickettsial Disease Laboratory, California Department of Public Health, Richmond, CA, USA. <sup>6</sup>Department of Medicine, Division of Infectious Diseases, University of California San Francisco, San Francisco, CA, USA. <sup>7</sup>These authors contributed equally: James P. Broughton, Xianding Deng. ✉e-mail: [janice@mammoth.bio](mailto:janice@mammoth.bio); [charles.chiu@ucsf.edu](mailto:charles.chiu@ucsf.edu)

## SUPPLEMENTARY FIGURES

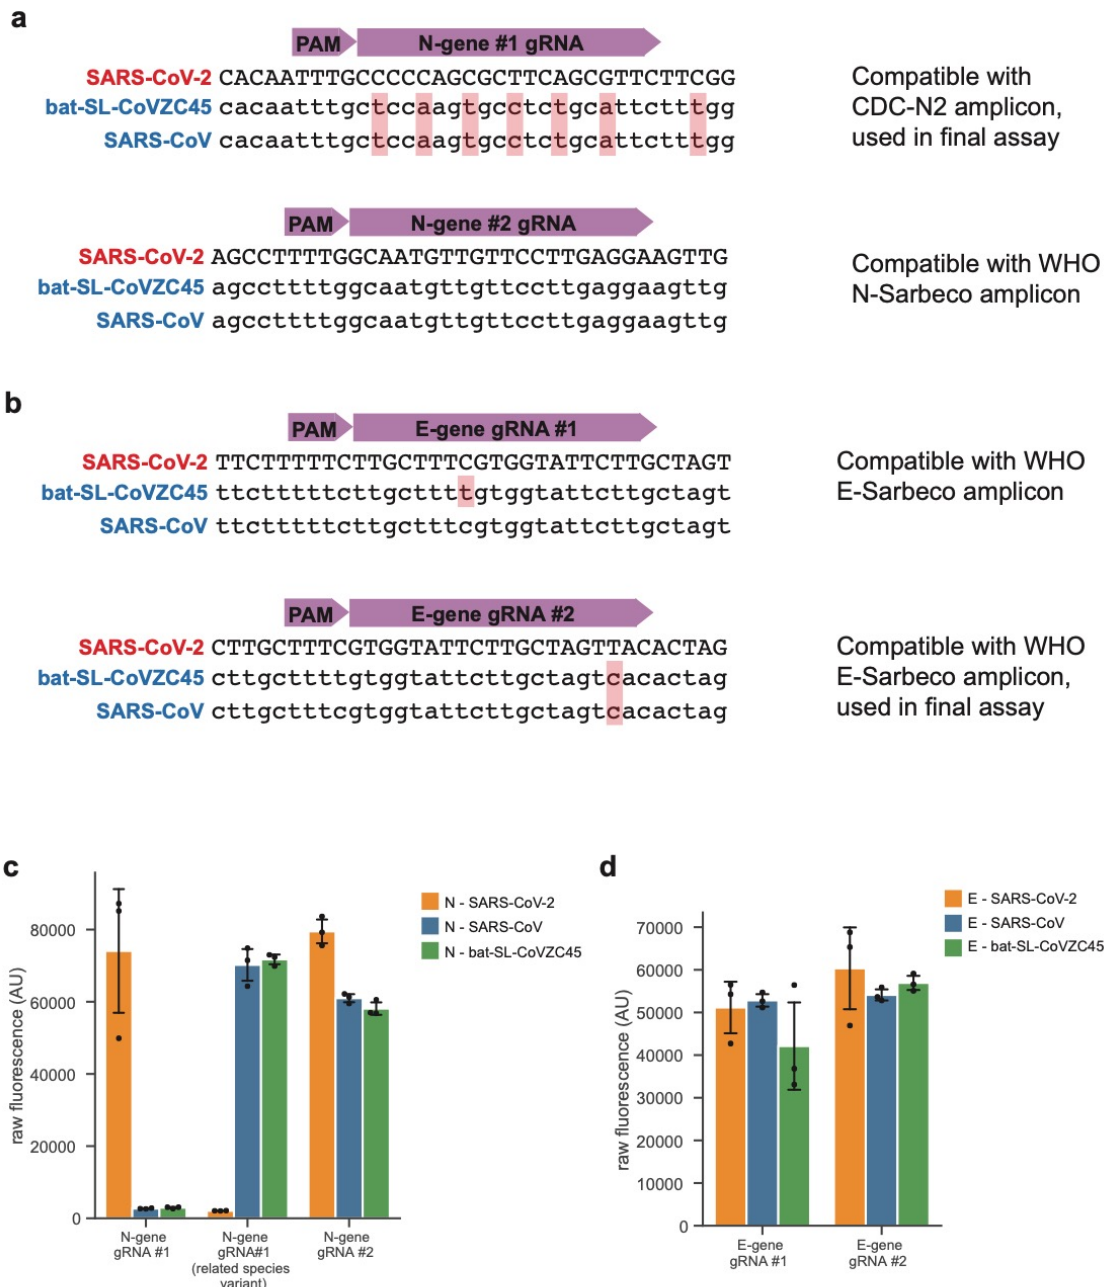

**Supplementary Figure 1.** Comparison of sequences between SARS-CoV-2, SARS-CoV, and bat-SL-CoVZC45 at the sites targeted by the gRNAs evaluated in this study. **(a)** The N gene gRNA #1 is compatible with the CDC-N2 amplicon, the N gene gRNA #2 is compatible with WHO N-Sarbeco amplicon and **(b)** the two E gene gRNAs tested are compatible with the WHO E-Sarbeco amplicon. **(c-d)** DETECTR fluorescence values using **(c)** N gene gRNAs and **(d)** E gene gRNAs. Error bars: mean  $\pm$  SD.

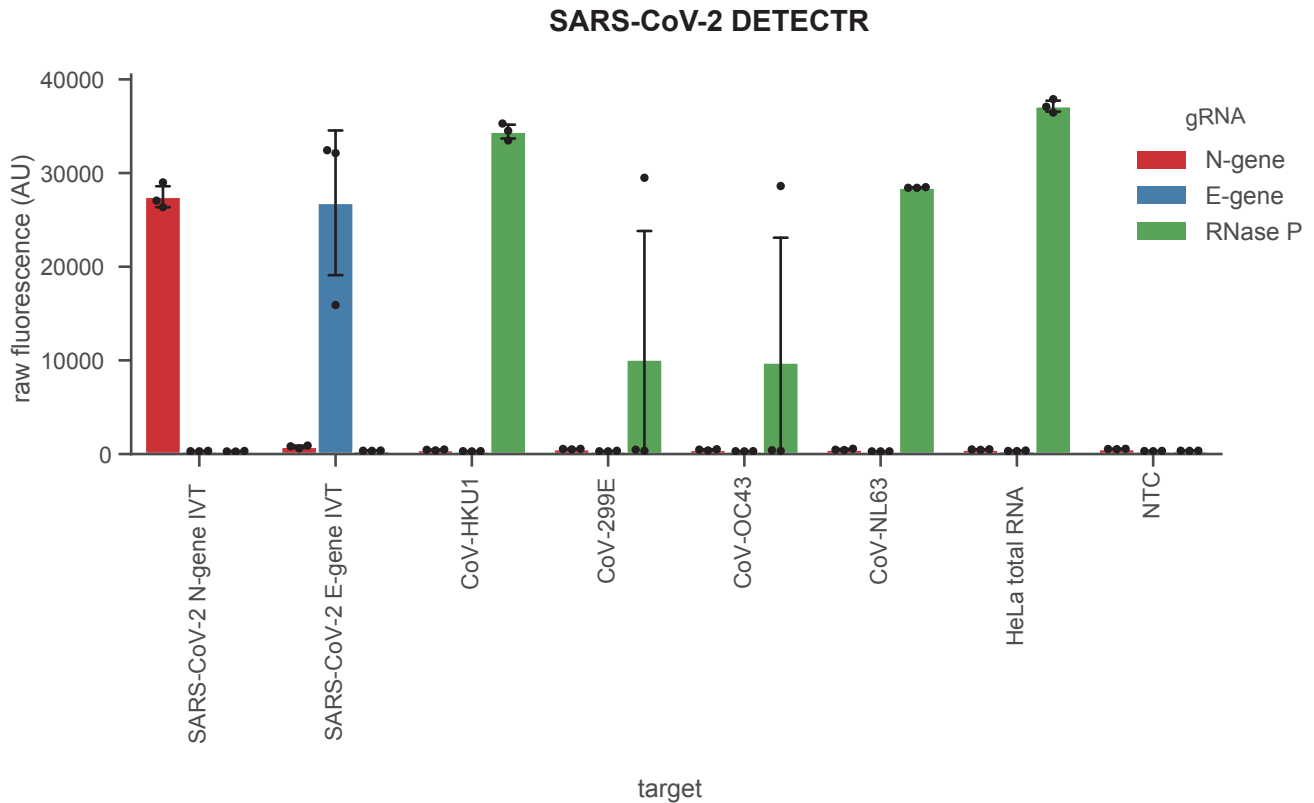

**Supplementary Figure 2.** Cross-reactivity of DETECTR to common human coronaviruses. SARS-CoV-2 DETECTR assay (RT-LAMP + Cas12a) was evaluated on IVT RNA products from SARS-CoV-2, SARS-CoV, bat-SL-CoVZC45, and clinical samples from common human coronaviruses. As expected, the N gene is only detected in SARS-CoV-2, whereas the E gene is detected only in SARS-CoV-2 and bat-SL-CoVZC45. SARS-CoV E gene was not detected as the RT-LAMP primer set is not capable of amplifying the SARS-CoV E gene, even though the E gene gRNA is capable of detecting the SARS-CoV E gene target site. RNase P is detected in common human coronaviruses because these samples are RNA extracted from clinical samples. Result shown at 15 min of LbCas12a detection assay signal on fluorescent plate reader. Error bars: mean  $\pm$  SD.

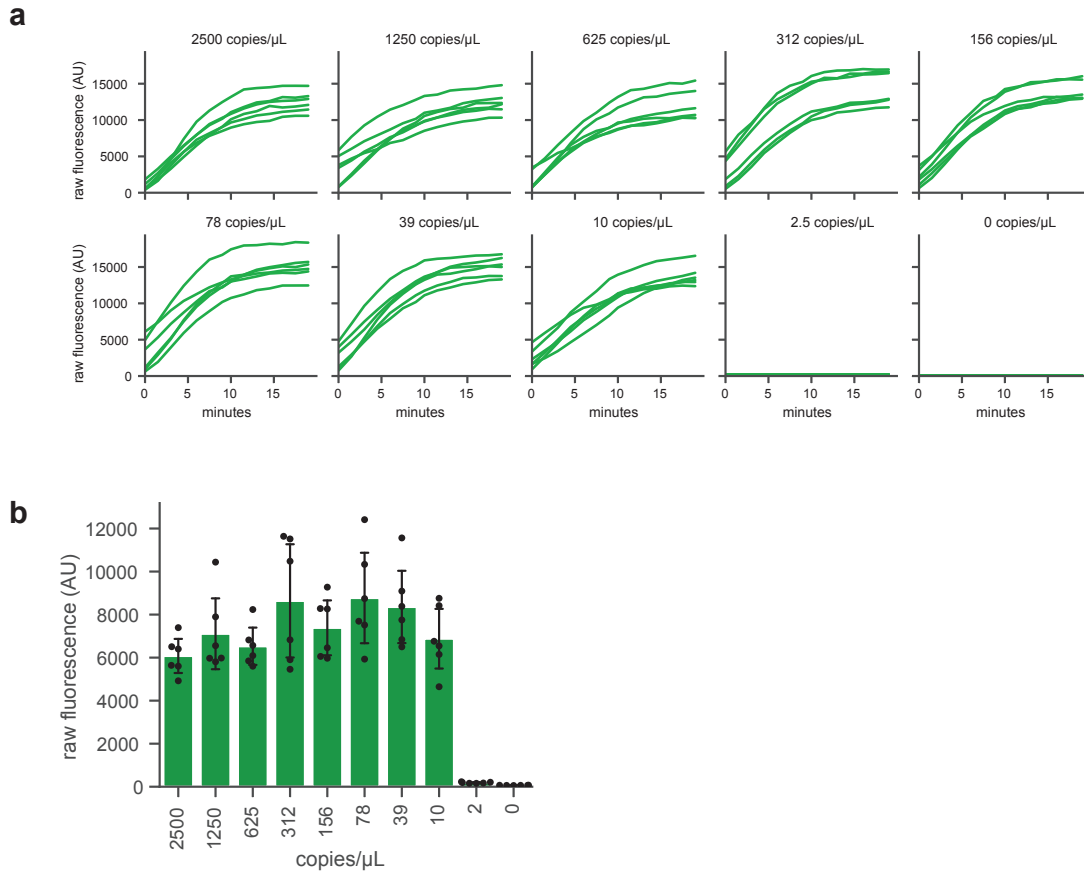

**Supplementary Figure 3.** DETECTR analysis of SARS-CoV-2 identifies down to 10 viral genomes in approximately 30 min (20 min amplification, 10 min DETECTR). Duplicate LAMP reactions were amplified for twenty min followed by LbCas12a DETECTR analysis. **(a)** Raw fluorescence curves generated by LbCas12a detection of SARS-CoV-2 N gene (n=6) show saturation in ~10 min. **(b)** Fluorescent signal at 5 minutes for LbCas12a reaction. Results indicate the limit of detection of the SARS-CoV-2 N gene to be 10 viral genomes per reaction (n=6). Error bars: mean  $\pm$  SD.

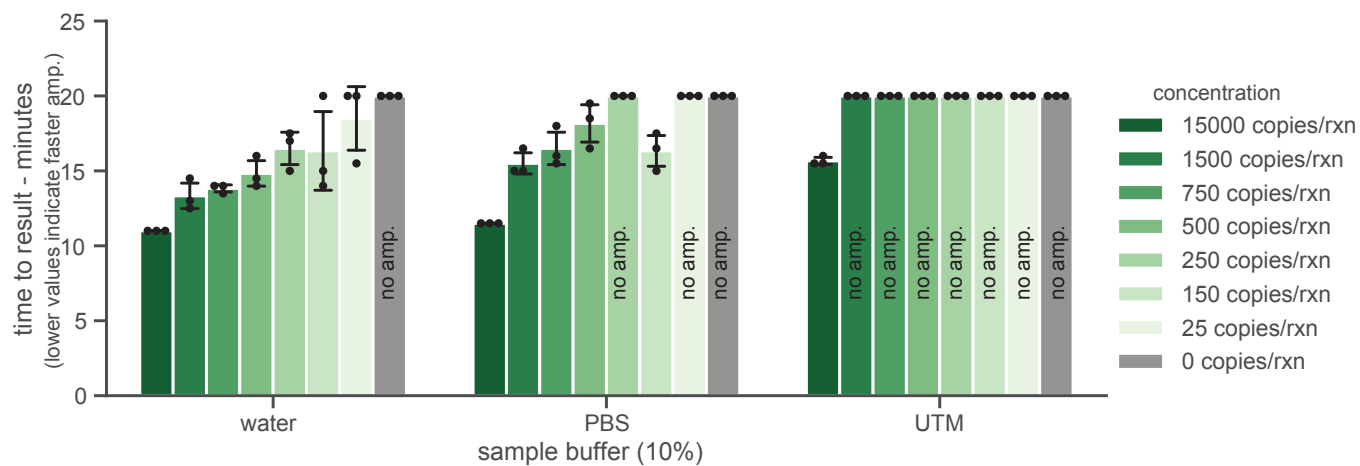

**Supplementary Figure 4.** Impact of sample buffers on performance of RT-LAMP pre-amplification. Time to result for RT-LAMP amplification (lower value indicates faster amplification) is calculated as the time at which the fluorescent value is one third of the max for the experiment. Reactions that failed to amplify are reported with a value of 20 minutes and labeled as “no amp.” RT-LAMP was performed with 10% universal transport medium (UTM), 10% PBS, or 10% water final volume for the SARS-CoV-2 N gene on a standard curve of the 2019-nCoV positive control plasmid (IDT) in 10% reaction volume. Results indicate that 10% PBS inhibits RT-LAMP less than 10% UTM. Error bars: mean  $\pm$  SD.

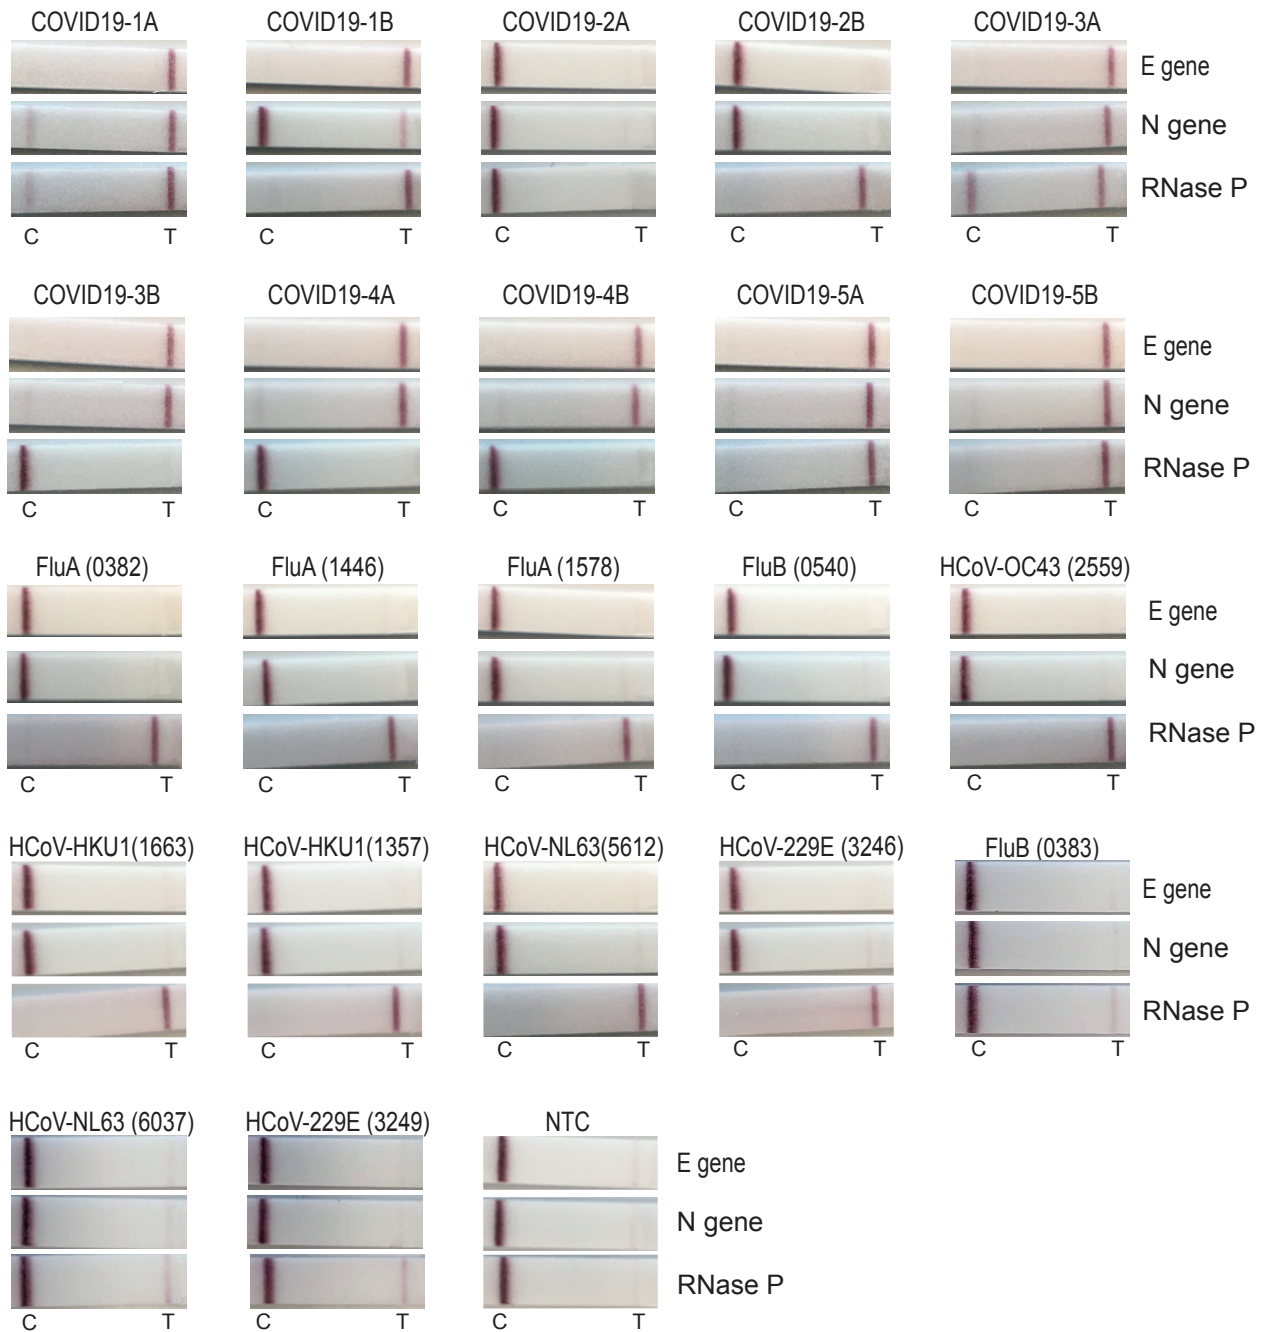

**Supplementary Figure 5.** Lateral flow DETECTR results on 10 COVID-19 infected patient samples and 12 patient samples for other viral respiratory infections. Ten samples from 6 patients (COVID19-1 to COVID19-5) with one nasopharyngeal swab (A) and one oropharyngeal swab (B) were tested for SARS-CoV-2 using two different genes, N2 and E as well as a sample input control, RNase P. Results were analyzed in accordance with the guidance provided in **Supplementary Fig. 6**.

### Interpretation of SARS-CoV-2 DETECTR lateral flow results

| Schematic                                       | Example                          | Description                                                                                                                                                                                                                                                                                                           |
|-------------------------------------------------|----------------------------------|-----------------------------------------------------------------------------------------------------------------------------------------------------------------------------------------------------------------------------------------------------------------------------------------------------------------------|
| <p>negative</p> <p>negative</p>                 | <p>C T</p> <p>C T</p>            | <p>Negative strips have no signal at the test line. Negative strips that have been allowed to sit at room temperature for over 10 minutes may display a faint signal at the test line or at the tape seam, but this signal is much fainter than a true positive signal.</p>                                           |
| <p>positive</p> <p>positive</p> <p>positive</p> | <p>C T</p> <p>C T</p> <p>C T</p> | <p>For strips indicating a positive result, there will be an easy to see band at the test line. The control band may or may not be present. The control band is not present when there is complete digestion of the reporter molecule by Cas12. In some cases the test band will be weaker than the control band.</p> |

**Supplementary Figure 6.** Instructions for the interpretation of SARS-CoV-2 DETECTR lateral flow results.

**a** E gene

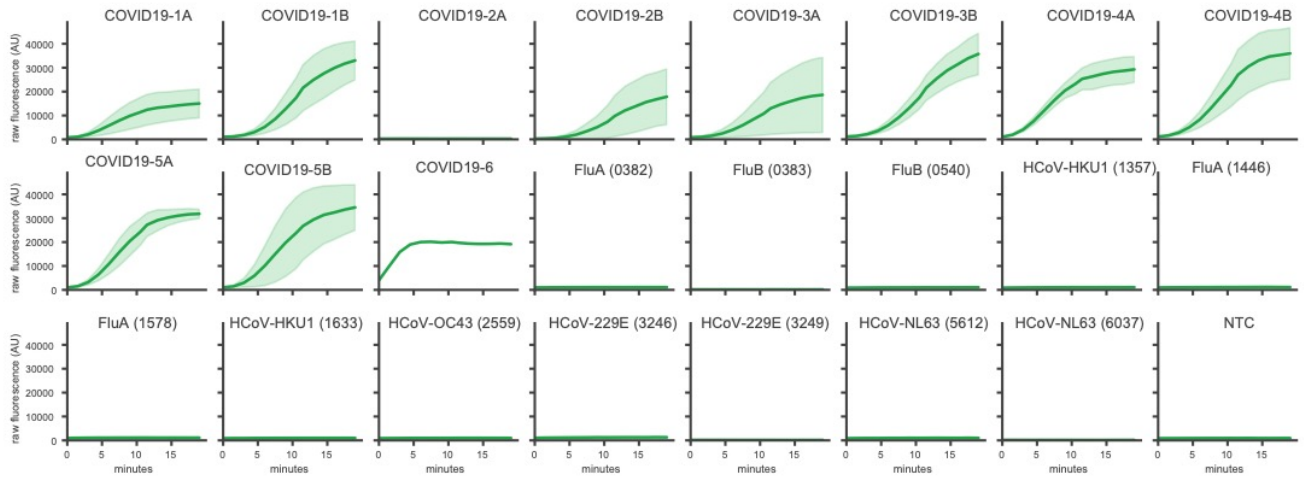

**b** N gene

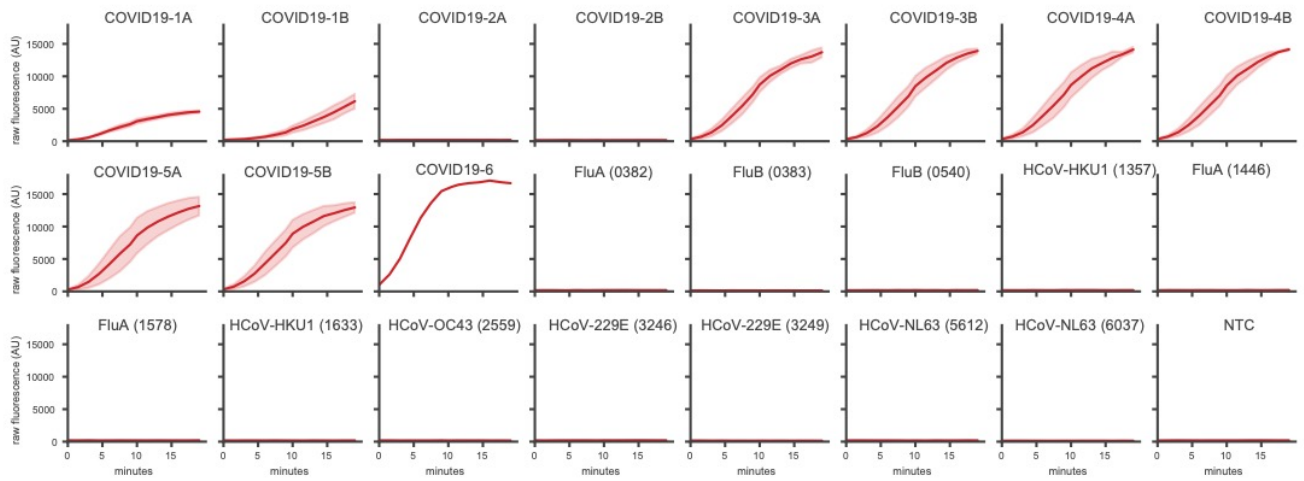

**c** RNase P

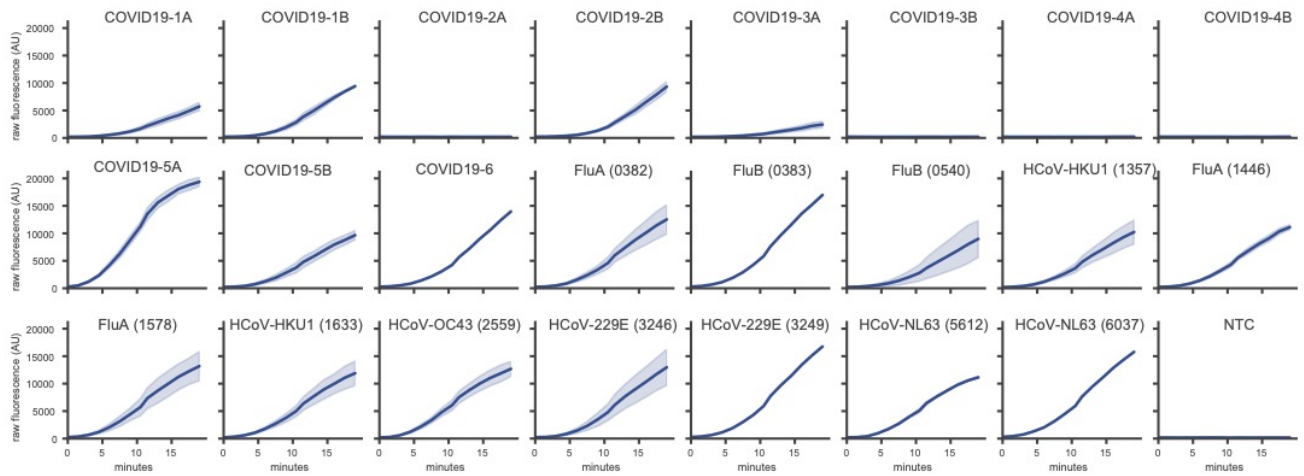



**Supplementary Figure 7.** Fluorescent DETECTR kinetic curves on 11 COVID-19 infected patient samples and 12 patient samples for other viral respiratory infections. Ten nasopharyngeal/oropharyngeal swab samples from 6 patients (COVID19-1 to COVID19-6) were tested for SARS-CoV-2 using two different genes, N2 and E as well as a sample input control, RNase P. **(a)** Using the standard amplification and detection conditions, 10 of the 12 COVID-19 positive patient samples resulted in robust fluorescence curves indicating presence of the SARS-CoV-2 E gene (20-minute amplification, signal within 10 min). No E gene signal was detected in the 12 other viral respiratory clinical samples. **(b)** The SARS-CoV-2 N gene required extended amplification time to produce strong fluorescence curves (30-minute amplification, signal within 10 min) for 10 of the 12 COVID-19 positive patient samples. No N gene signal was detected in the 12 other viral respiratory clinical samples. **(c)** As a sample input control, RNase P was positive for 20 of the 24 total samples tested (20-minute amplification, signal within 10 min).



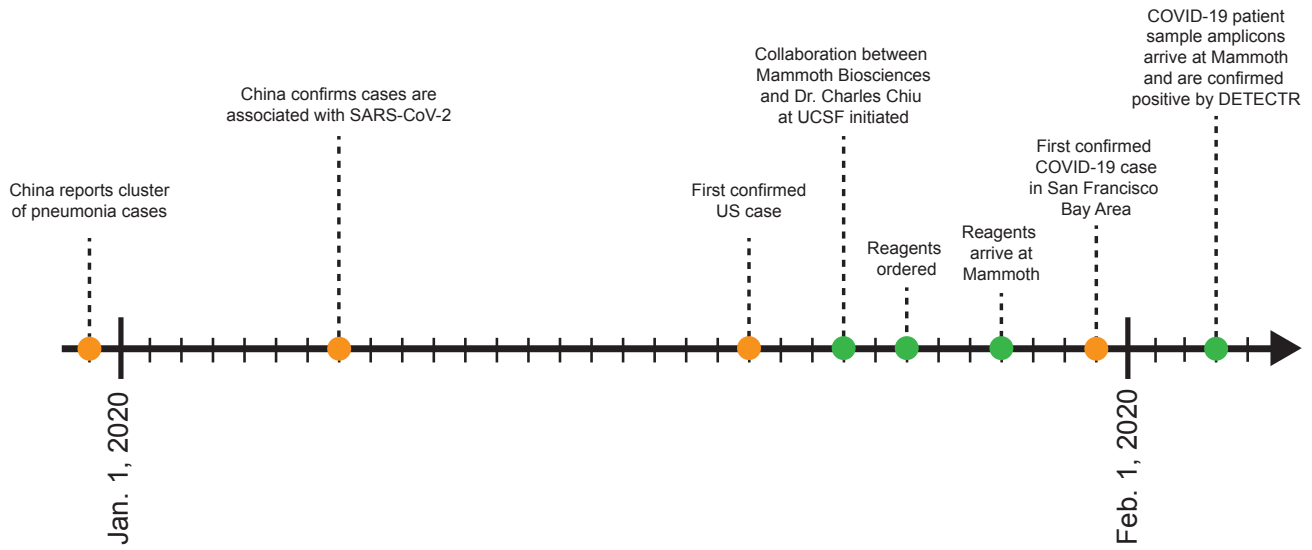

**Supplementary Figure 9.** Timeline showing major events in the progression of COVID-19 detection (marked in orange) and assay development (marked in green).
